# Supplementary material for: Association between peripheral venous catheter failure and care complexity factors in emergency department: a cross-sectional study
Source: HighWire-hosted journal article supplement (doi:10.1136/bmjopen-2024-090101), 2024-10-01
Supplement: bmjopen-2024-090101supp001_data_supplement.pdf [file bmjopen-2024-090101supp001_data_supplement.pdf]

Supplementary file. Care complexity individual factors included in this study.

| Domains                       | CCIFs                               | Specifications                                                                                                    |
|-------------------------------|-------------------------------------|-------------------------------------------------------------------------------------------------------------------|
| Comorbidity and complications | Uncontrolled pain                   | Pain > 3 in Visual Analogue Scale (VAS) without analgesic treatment or with ineffective treatment.                |
|                               | Hemodynamic instability             | Categorized with a moderate or high risk of acute impairment, according to the VIDA system.                       |
|                               | Incontinence                        | Urinary or fecal incontinence.                                                                                    |
|                               | Transmissible infection             | Amputation, limitation of movement, joint stiffness or functional impotence.                                      |
|                               | Anatomical and functional disorders | Patients with isolation measures.                                                                                 |
|                               | Extreme weight                      | Cachexia and obesity                                                                                              |
|                               | Postural limitation                 | Inability to carry out activities such as feeding, hygiene or toileting and to sit, ambulate or maintain balance. |
|                               | High-risk of hemorrhage             | Rectal bleeding, hematuria, hematemesis, metrorrhagia, petechiae, epistaxis, melena.                              |
|                               | Vascular fragility                  | Cutaneous and venous fragility, venous tortuosity, weak peripheral pulses.                                        |
|                               | Communication disorders             | Aphasia, dysphasia, dysarthria, laryngectomy, tracheostomy.                                                       |
|                               | Edema                               | Peripheral edema with pitting, dependent edema with pitting or anasarca.                                          |
|                               | Involuntary movements               | Episodic or continuous convulsions or tremor.                                                                     |
|                               | Dehydration                         | Skin turgor.                                                                                                      |
| Developmental                 | Extreme age                         | Age ≥75 years.                                                                                                    |
| Psycho-emotional              | Anxiety and fear                    | Anxiety or Fear (moderate or severe and punctual, episodic or continuous).                                        |
|                               | Impaired adaptation                 | Lability, negativity, distrust of the care team.                                                                  |
|                               | Aggressiveness                      | Physical or verbal aggressive behaviour (moderate or intense and punctual, episodic or continuous)                |
| Mental-cognitive              | Consciousness disorders             | Disorientation, confusion, drowsiness, stupor, unconsciousness                                                    |
|                               | Agitation                           | Occasional or episodic psychomotor agitation.                                                                     |
|                               | Impaired cognitive functions        | Intellectual disability.                                                                                          |
|                               | Perception of reality disorders     | Hallucinations.                                                                                                   |
| Sociocultural                 | Language limitation                 | Patient does not understand or speak the language and that they do not have a family or external interpreter.     |
|                               | Lack of caregiver support           | No caregiver, caregiver burnout.                                                                                  |
|                               | Belief conflict                     | Hopelessness, anguish                                                                                             |
|                               | Social exclusion                    | Indigence and extreme poverty.                                                                                    |
|                               | Illiteracy                          | Illiteracy or very low cultural level.                                                                            |
